# Supplementary material for: The myokine Fibcd1 is an endogenous determinant of myofiber size and mitigates cancer-induced myofiber atrophy
Source: PubMed Central journal article supplement (PMC9061726; doi:10.1038/s41467-022-30120-1), 2022-05-02
Supplement: 41467_2022_30120_MOESM3_ESM.pdf [file 41467_2022_30120_MOESM3_ESM.pdf]

**Title:** Supplementary Data 1.

**Description:** Drosophila RNAi screening identifies evolutionary conserved myokines that regulate myofiber size.

**Title:** Supplementary Data 2.

**Description:** Genes regulated in diaphragm muscles from mice with LLC cancers but not in diaphragm muscles from mice with LLC cancers upon treatment with rFibcd1.

**Title:** Supplementary Data 3.

**Description:** qRT-PCR oligos.

**Title:** Supplementary Data 4.

**Description:** Genes that are commonly upregulated and downregulated in the diaphragm, tibialis anterior, and soleus muscles of mice with cachectic versus non-cachectic melanomas.

**Title:** Supplementary Data 5.

**Description:** Genes differentially regulated in diaphragm muscles of mice with cachectic versus non-cachectic melanomas, and treated with either rFibcd1 or mock.
